# Supplementary material for: PTX-3 Secreted by Intra-Articular-Injected SMUP-Cells Reduces Pain in an Osteoarthritis Rat Model
Source: MDPI journal article supplement (doi:10.3390/cells10092420), 2021-09-14
Supplement: s1 [file s1]

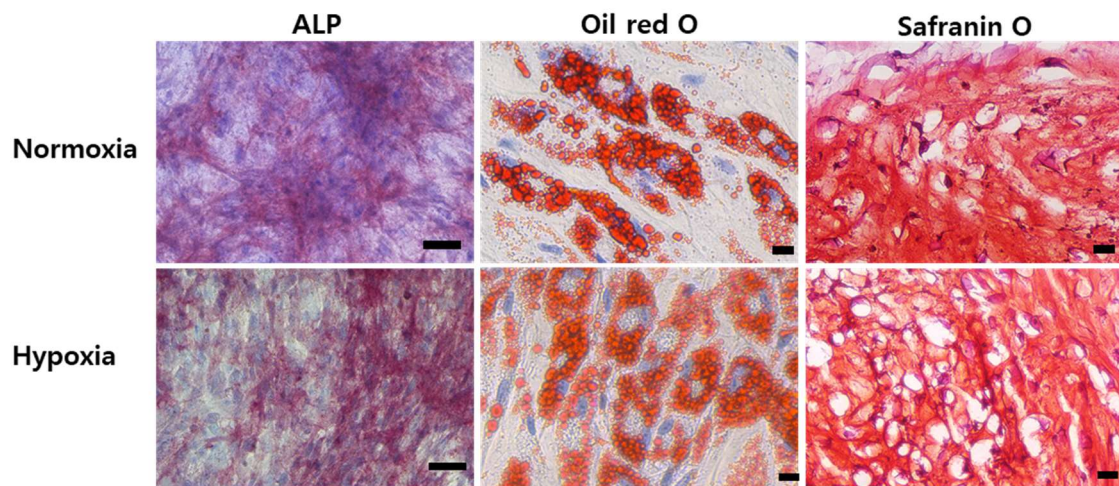

**Figure S1.** Multi-lineage differentiation. We prepared different condition of UCB-MSCs (normoxia vs. 3% hypoxia). After incubation in specialized induction media, cells showed multi-lineage differentiation based on staining for positive markers. Osteogenic cells were analyzed according to ALP level, adipogenic cells showed promoted lipid vacuoles within the cytoplasm via Oil Red O staining, and chondrogenic cells accumulated sulfated proteoglycans stained with Safranin O. Nuclei were counterstained with hematoxylin. Scale bar: 100  $\mu$ m.

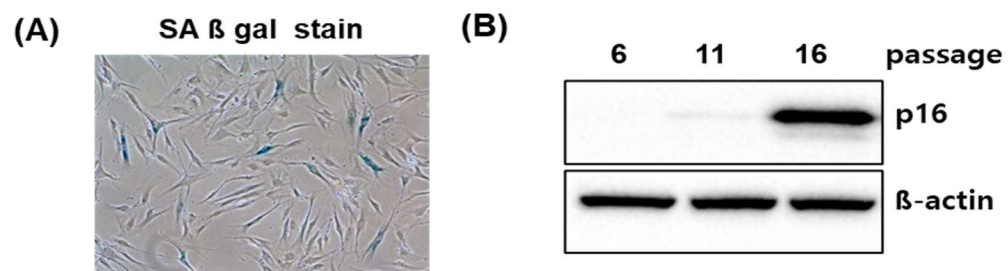

**Figure S2. Senescence phenotype of SMUP-Cell following expansion.** (A) The cells were stained to analyze SA  $\beta$  gal expression at passage 16 using microscope (blue). (B) Senescence protein, p16 was measured by immunoblotting. The level of p16 expression increased during passage 6 to passage 16. Expression levels were normalized to  $\beta$ -actin.

(A)

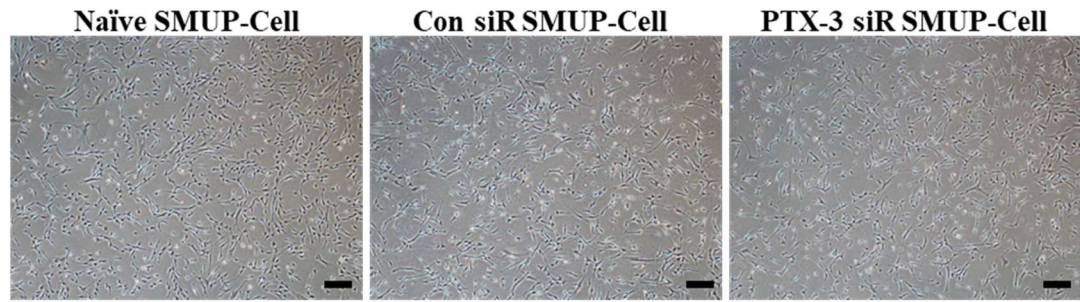

(B)

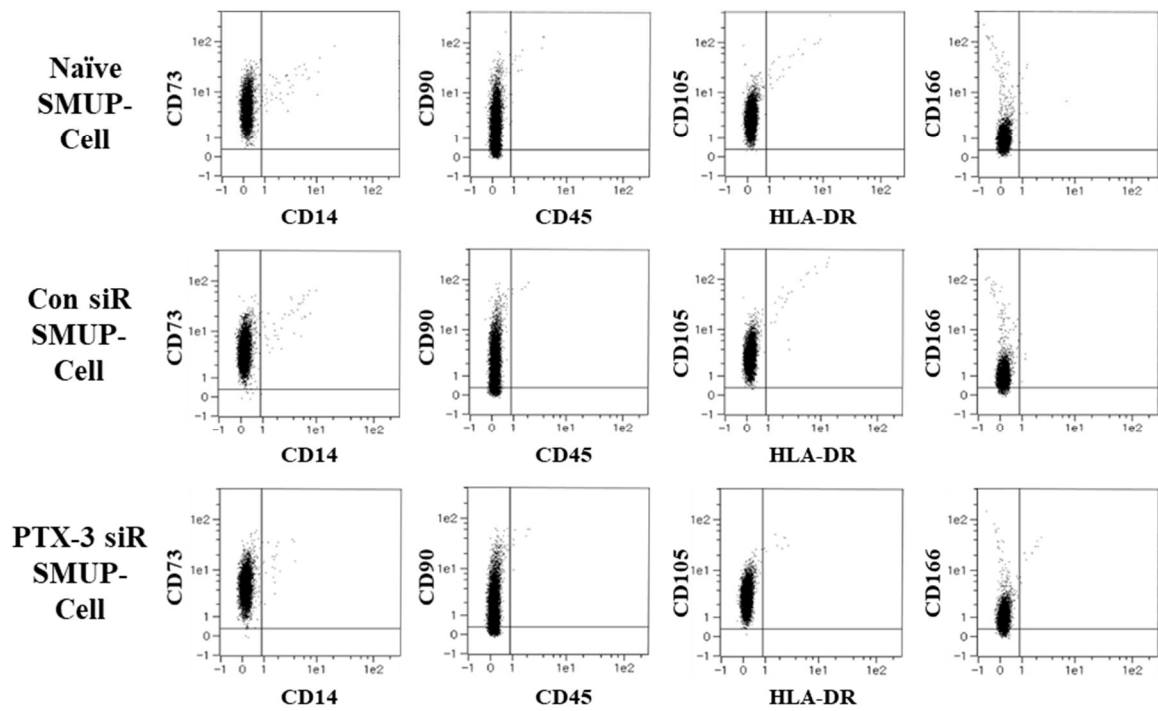

**Figure S3. Comparison of MSC characteristics based on PTX-3 expression. SMUP-Cell under three conditions were prepared. (A) Morphology was analyzed in naïve, Con siR, and PTX-3 siR by microscope. All SMUP-Cell were observed as fibroblast like shape. (B) Surface antigen expression were tested by flow cytometry. Three condition cells were strongly positive for MSC specific marker CD73, CD90, CD105, and CD166, and they were negative for CD14, CD45, and HLA-DR.**

(A)

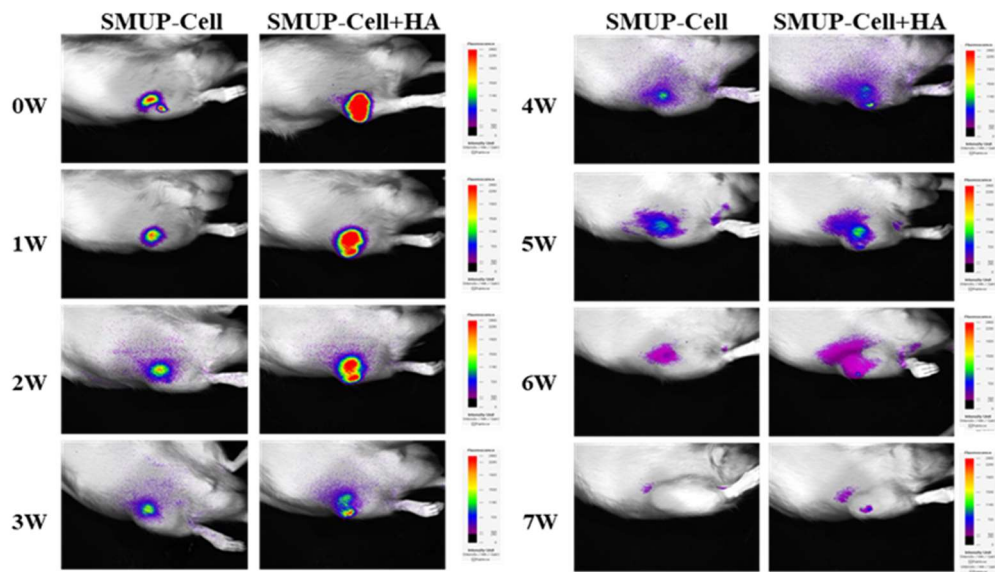

(B)

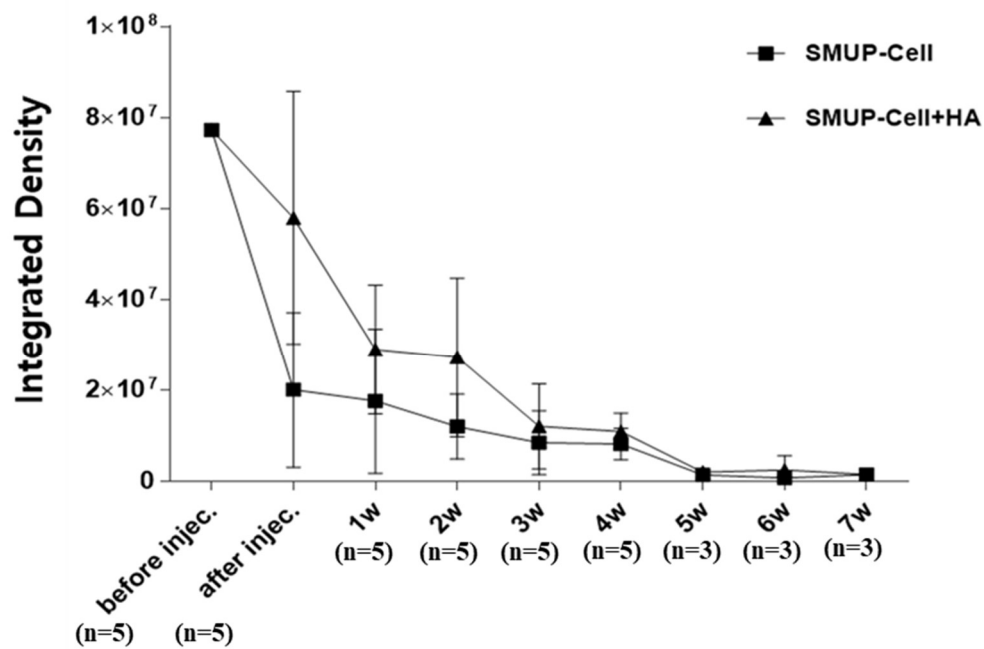

**Figure S4. *In vivo* imaging of SMUP-Cells injected with or without HA into the MIA-induced OA rat model.** (A) *In vivo* imaging. SMUP-Cells labeled with Neostatin 749 dye were transplanted into the OA rat knee and observed using a fluorescence imaging system for 7 weeks. Images were obtained at weeks 0 through week 7 after SMUP-Cell injection. (B) Integrated density was analyzed using the NEO imaging program (<http://www.neoimaging.cn/>). (A, B) Error bars represent the mean  $\pm$  SEM. HA, Hyaluronic Acid; MIA, Monosodium Iodoacetate; Raw 264.7 cells; L, LPS-stimulated cells; SMUP, SMUP-Cell. Number (n) is per group.

**Table S1. Small cell check**

| SMUP-Cell | <u>Smaller cell portion (% , ≤10um)</u> |              |
|-----------|-----------------------------------------|--------------|
|           | Before filter                           | After filter |
| #1        | 35                                      | 91           |
| #2        | 42                                      | 95           |
| #3        | 50                                      | 93           |
| #4        | 30                                      | 92           |
| #5        | 35                                      | 90           |
| mean±SD   | 38.4±7.7                                | 93±1.9       |

**Table S2. Bioreactor conditions**

| Condition | Initial seeding<br>(cells/cm <sup>2</sup> ) | pH        | Temperature<br>(° C) | DO<br>(%) | Culture time<br>(day) |
|-----------|---------------------------------------------|-----------|----------------------|-----------|-----------------------|
| Range     | 500 ~ 3,000                                 | 7.2 ~ 7.4 | 37.0 ± 1.0           | 2 ~ 5     | 6 ~ 8                 |

DO: dissolved Oxygen

**Table S3. Basic information of SMUP-Cell characterization**

| SMUP-Cell | <u>Surface marker</u> |          | Differentiation |
|-----------|-----------------------|----------|-----------------|
|           | Positive              | Negative |                 |
| #1        | Pass                  | Pass     | Pass            |
| #2        | Pass                  | Pass     | Pass            |
| #3        | Pass                  | Pass     | Pass            |
| #4        | Pass                  | Pass     | Pass            |
| #5        | Pass                  | Pass     | Pass            |

UCBs were isolated from five independent donors (UCB #1 to 5). SMUP-Cell characterization was performed by assessing MSC surface marker expression and MSC differentiation capacity (positive: CD29, CD73, CD90, CD105, and CD166  $\geq$  85%; negative: CD14, CD45, and HLA-DR  $\leq$  1.0%; differentiation: osteogenic, chondrogenic, adipogenic).

**Table S4. Multi-differentiation condition**

| <b>Differentiaton</b> |           | <b>Reagent</b>                           |                  |
|-----------------------|-----------|------------------------------------------|------------------|
| Osteogenesis          | Induction | StemPro Osteogenesis Differentiation Kit | Gibco            |
|                       | Staining  | Alkaline Phosphatase Staining Kit II     | Stemgent         |
|                       |           | Von Kossa Method for Calcium Kit         | Polysciences     |
| Chondrogenesis        | Induction | Dulbecco's modified Eagle's medium       | Gibco            |
|                       |           | TGF $\beta$ -3 (10ng/mL)                 | R&D systems      |
|                       |           | BMP-6 (500ng/mL)                         | R&D systems      |
|                       |           | Ascorbic Acid (50ug/mL)                  | Sigma-Aldrich    |
|                       |           | ITS (50mg/mL, 1:100)                     | Sigma-Aldrich    |
|                       |           | L-proline (40ug/mL)                      | Sigma-Aldrich    |
|                       |           | Pyruvic acid (100ug/mL)                  | Sigma-Aldrich    |
|                       |           | Dexametasone (100nM)                     | Sigma-Aldrich    |
|                       | Staining  | Safranin O                               | Sigma-Aldrich    |
|                       |           | Collagen II                              | abcam            |
| Adipogenesis          | Induction | Dulbecco's modified Eagle's medium       | Gibco            |
|                       |           | FBS (10%)                                | Gibco            |
|                       |           | 3-isobutyl-1-methylxanthine (0.5mM)      | Sigma-Aldrich    |
|                       |           | Dexametasone (1mM)                       | Sigma-Aldrich    |
|                       |           | Indomethacin (0.2mM)                     | Sigma-Aldrich    |
|                       |           | h-Insulin (10mM)                         | Sigma-Aldrich    |
|                       | Staining  | Oil red O                                | Sigma-Aldrich    |
|                       |           | BODIPY 493/503                           | Molecular Probes |



**Table S5. For proteome profile human array panel (55 spot)**

| <b>Coordinate</b> | <b>Target</b>             | <b>Coordinate</b> | <b>Target</b>           |
|-------------------|---------------------------|-------------------|-------------------------|
| A1, A2            | Refence Spots             | C17, C18          | IL-8                    |
| A5, A6            | Activin A                 | C19, C20          | LAP(TGF- $\beta$ 1)     |
| A7, A8            | ADAMTS-1                  | C21, C22          | Leptin                  |
| A9, A10           | Angiogenin                | C23, C24          | MCP-1                   |
| A11, A12          | Angiopoietin-1            | D1, D2            | MIP-1 $\alpha$          |
| A13, A14          | Angiopoietin-2            | D3, D4            | MMP-8                   |
| A15, A16          | Angiostatin/Plasminogen   | D5, D6            | MMP-9                   |
| A17, A18          | Amphiregulin              | D7, D8            | NRG1- $\beta$ 1         |
| A19, A20          | Artemin                   | D9, D10           | Pentraxin 3 (PTX3)      |
| A23, A24          | Reference Spots           | D11, D12          | PD-ECGF                 |
| B1, B2            | Coagulation Factor III    | D13, D14          | PDGF-AA                 |
| B3, B4            | CXCL16                    | D15, D16          | PDFG-AB/PDFG-BB         |
| B5, B6            | DPPIV                     | D17, D18          | Persephin               |
| B7, B8            | EGF                       | D19, D20          | Platelet Factor 4 (PF4) |
| B9, B10           | EG-VEGF                   | D21, D22          | PIGF                    |
| B11, B12          | Endoglin                  | D23, D24          | Prolactin               |
| B13, B14          | Endostatin/Collagen XVIII | E1, E2            | Serpin B5               |
| B15, B16          | Endothelin-1              | E3, E4            | Serpin E1               |
| B17, B18          | FGF acidic                | E5, E6            | Serpin F1               |
| B19, B20          | FGF basic                 | E7, E8            | TIMP-1                  |
| B21, B22          | FGF-4                     | E9, E10           | TIMP-4                  |
| B23, B24          | FGF-7                     | E11, E12          | Thrombospondin-1        |
| C1, C2            | GDNF                      | E13, E14          | Thrombospondin-2        |
| C3, C4            | GM-CSF                    | E15, E16          | uPA                     |
| C5, C6            | HB-EGF                    | E17, E18          | Vasohibin               |
| C7, C8            | HGF                       | E19, E20          | VEGF                    |
| C9, C10           | IGFBP-1                   | E21, E22          | VEGF-C                  |
| C11, C12          | IGFBP-2                   | F1, F2            | Reference Spots         |
| C13, C14          | IGFBP-3                   | F23, F24          | Negative Control        |
| C15, C16          | IL-1 $\beta$              |                   |                         |

**Table S6. qRT-PCR primers and siRNA sequences**

| <b>Gene</b>             |       | <b>Primer sequence (5'→3')</b> |
|-------------------------|-------|--------------------------------|
| Mouse<br>GAPDH          | Left  | AGCTTGTCATCAACGGGAAG           |
|                         | Right | TTTGATGTTAGTGGGGTCTCG          |
| Mouse<br>IL-6           | Left  | GCTACCAAACCTGGATATAATCAGGA     |
|                         | Right | CCAGGTAGCTATGGTACTCCAGAA       |
| Mouse<br>TNF- $\alpha$  | Left  | TCTTCTCATTCTGCTTGTGG           |
|                         | Right | GGTCTGGGCCATAGAACTGA           |
| Mouse<br>IL-1 $\beta$   | Left  | AGTTGACGGACCCCAAAAG            |
|                         | Right | AGCTGGATGCTCTCATCAGG           |
| Mouse<br>ARG-1          | Left  | GAATCTGCATGGGCAACC             |
|                         | Right | GAATCCTGGTACATCTGGGAAC         |
| Human<br>PTX-3          | Left  | GCGGTGCTAGAGGAGCTG             |
|                         | Right | GGAATAAAATAGCTGTTTCACAACCT     |
| Scramble<br>siRNA       | #1    | UGGUUUACAUGUCGACUAA            |
|                         | #2    | UGGUUUACAUGUUGUGUGA            |
|                         | #3    | UGGUUUACAUGUUUUCUGA            |
|                         | #4    | UGGUUUACAUGUUUCCUA             |
| human<br>PTX-3<br>siRNA | #1    | GUGAAUUUGGACAACGAAA            |
|                         | #2    | CUGCAGUGUUGGCCGAGAA            |
|                         | #3    | GGUCAGGAGCACUCGGAAU            |
|                         | #4    | GGAUAGUGUUCUUAGCAAU            |

**Table S7. Experimental design in vivo**

| <b>Group (number)</b>       | <b>MIA<br/>(2 mg/50 ul)</b> | <b>Cells/Sol1<br/>(2.5×10<sup>5</sup>/25ul)</b> | <b>HA<br/>(1%, 25ul)</b> |
|-----------------------------|-----------------------------|-------------------------------------------------|--------------------------|
| Normal (n=6)                | -                           | -                                               | -                        |
| MIA (n=6)                   | +                           | -                                               | -                        |
| MIA+HA (n=6)                | +                           | -                                               | +                        |
| MIA+HA+Naïve SMUP (n=6)     | +                           | +                                               | +                        |
| MIA+HA+Con siR SMUP (n=6)   | +                           | +                                               | +                        |
| MIA+HA+PTX-3 siR SMUP (n=6) | +                           | +                                               | +                        |

**Table S8. Percent of weight on ipsilateral limb**

| Days | Normal     | MIA           | MIA+HA        | MIA+HA         |                  |                |
|------|------------|---------------|---------------|----------------|------------------|----------------|
|      |            |               |               | Naïve SMUP     | Con siR SMUP     | PTX-3 siR SMUP |
| 0    | 49.97±0.39 | 50.03±0.18    | 50.32±0.40    | 50.99±0.43     | 49.97±0.52       | 49.74±0.41     |
| 1    | 50.12±0.32 | 33.72±1.20*** | 30.14±1.41*** | 30.84±1.67***  | 32.18±1.61***    | 32.4±1.49***   |
| 4    | 49.87±0.21 | 31.61±1.20*** | 28.99±2.21*** | 30.45±1.78***  | 31.62±2.33***    | 32.00±1.75***  |
| 7    | 49.80±0.30 | 30.39±1.67*** | 28.31±2.45*** | 37.30±2.26***# | 31.16±2.29***    | 32.07±0.41***  |
| 14   | 50.64±0.19 | 27.24±2.14*** | 27.67±1.22*** | 45.89±0.44###  | 41.39±3.02***### | 31.99±1.88***  |
| 21   | 49.98±0.17 | 27.17±1.24*** | 25.22±1.59*** | 48.23±1.26###  | 45.54±2.22*###   | 28.88±1.47***  |
| 28   | 49.32±0.45 | 25.31±1.01*** | 24.5±1.60***  | 48.4±1.08###   | 41.68±6.13###    | 28.39±1.27***  |

Data represent the mean ± SEM (n = 6 per group, Fig 6a result). \*, p < 0.05, \*\*, p < 0.01, \*\*\*, p < 0.001 (vs. normal), #, p<0.05, ##, p<0.01, ###, p < 0.001 (vs. MIA)
